# Supplementary figures and images for: Isolation and structural characterization of the first thermally robust and air stable Cr(4+) bent-metallocene complexElectronic supplementary information (ESI) available: details of synthesis and characterization for 4 and 5. See http://www.rsc.org/suppdata/cc/b3/b311352c/
Source: Royal Society of Chemistry journal article supplement (doi:10.1039/b311352c), 2003-12-19

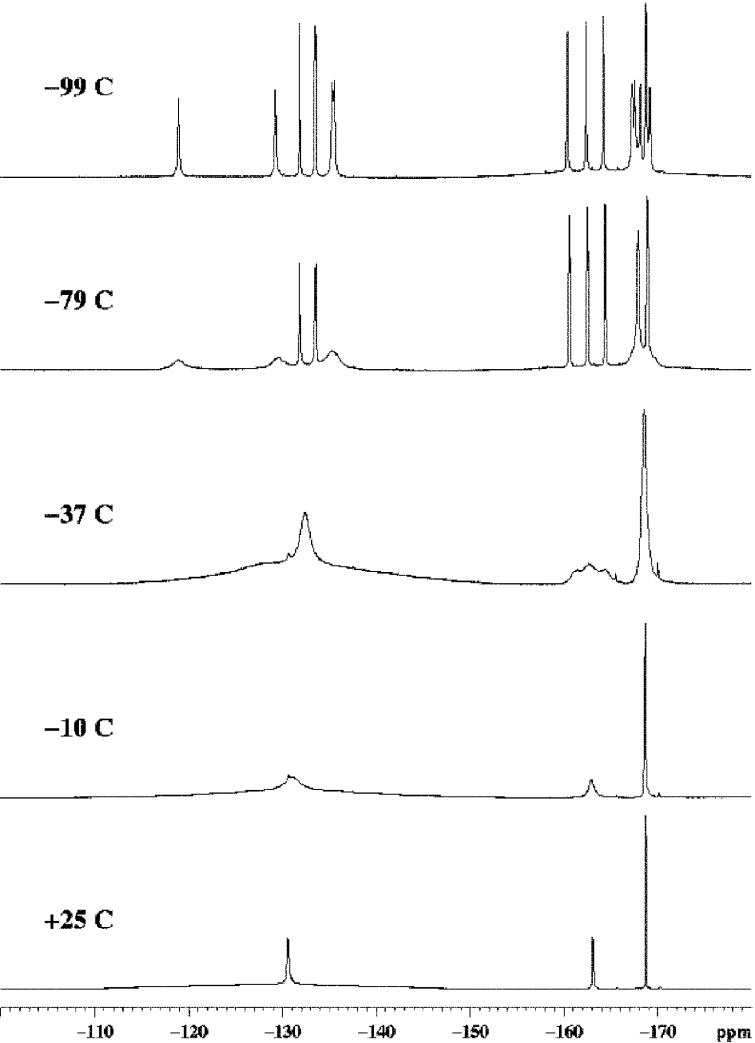

Supplement: b311352c-f4.pdf [file b311352c-f4.pdf]
